# Supplementary material for: Electronic engineering of amorphous Fe–Co–S sites in hetero-nanoframes for oxygen evolution and flexible Al–air batteries
Source: Royal Society of Chemistry journal article supplement (doi:10.1039/d2ta00191h), 2022-01-01
Supplement: d2ta00191h1.pdf [file d2ta00191h1.pdf]

## Supporting Information

### **Electronic Engineering of Amorphous Fe-Co-S sites in Hetero-nanoframes For Oxygen Evolution and Flexible Al-air Batteries**

Min Lu<sup>a</sup>, Li An<sup>a</sup>, Jie Yin<sup>a</sup>, Jing Jin<sup>a</sup>, Rui Yang<sup>a</sup>, Bolong Huang,<sup>\*b</sup> Yang Hu<sup>a</sup>, Yong-Qing Zhao<sup>a</sup>, and Pinxian Xi,<sup>\*a</sup>

<sup>a</sup> State Key Laboratory of Applied Organic Chemistry, Frontiers Science Center for Rare Isotopes, College of Chemistry and Chemical Engineering, Lanzhou University, Lanzhou 730000, China. E-mail: xipx@lzu.edu.cn

<sup>b</sup> Department of Applied Biology and Chemical Technology, The Hong Kong Polytechnic University, Hung Hum, Kowloon, Hong Kong SAR, China. E-mail: bhuang@polyu.edu.hk

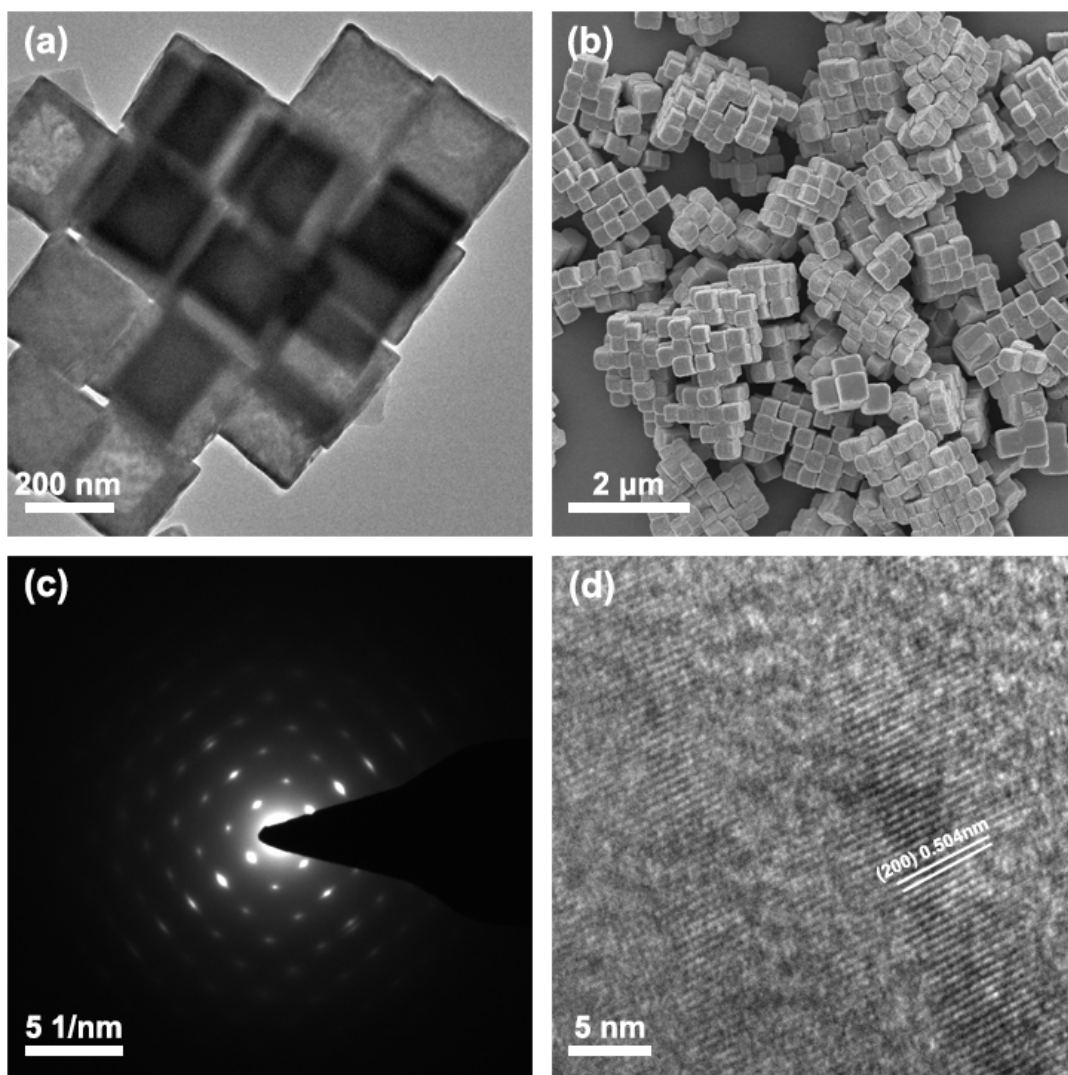

**Figure S1.** (a) TEM image of PBA. (b) SEM image of PBA. (c) SAED image of PBA. (d) HRTEM image of PBA.

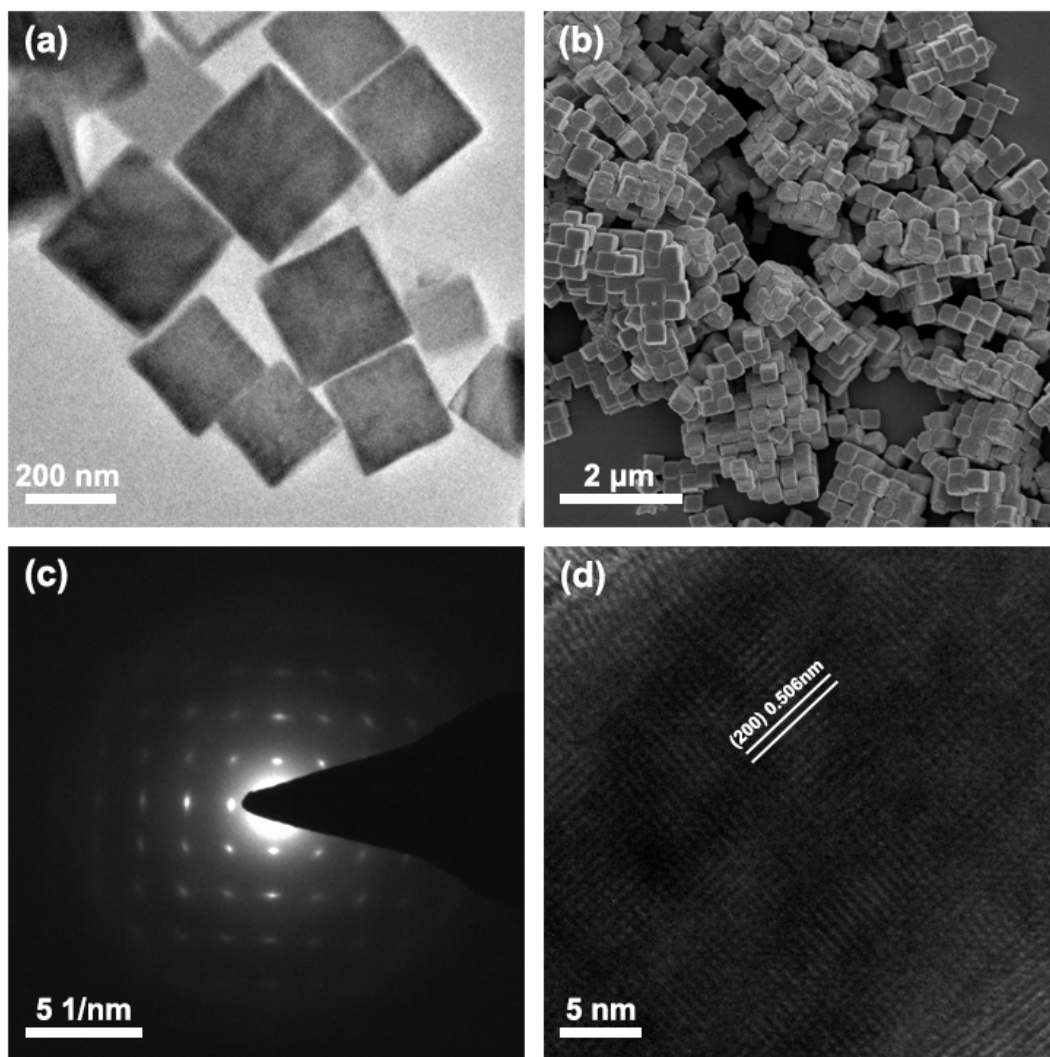

**Figure S2.** (a) TEM image of MPBA. (b) SEM image of MPBA. (c) SAED image of MPBA. (d) HRTEM image of MPBA.

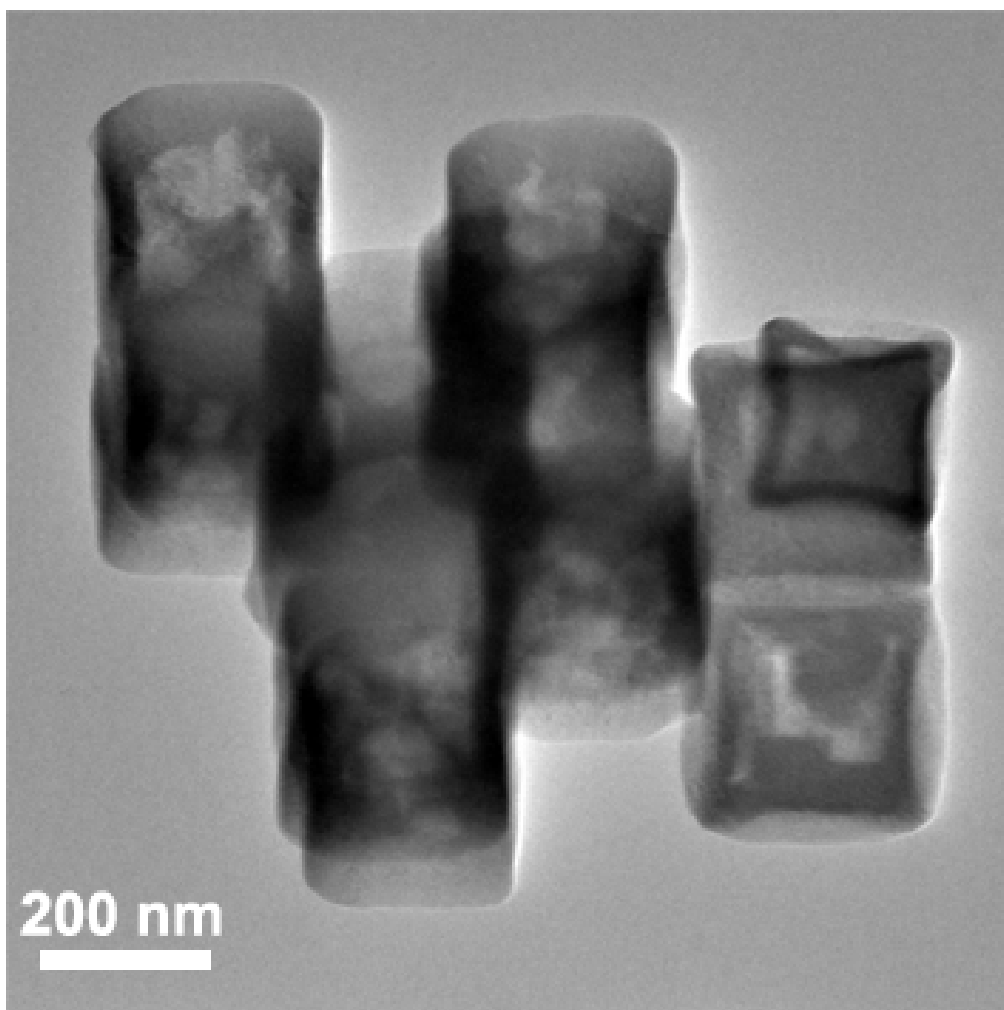

**Figure S3.** TEM image of PBA corroded by 2 M HCl without the exist of Fe<sup>2+</sup>.

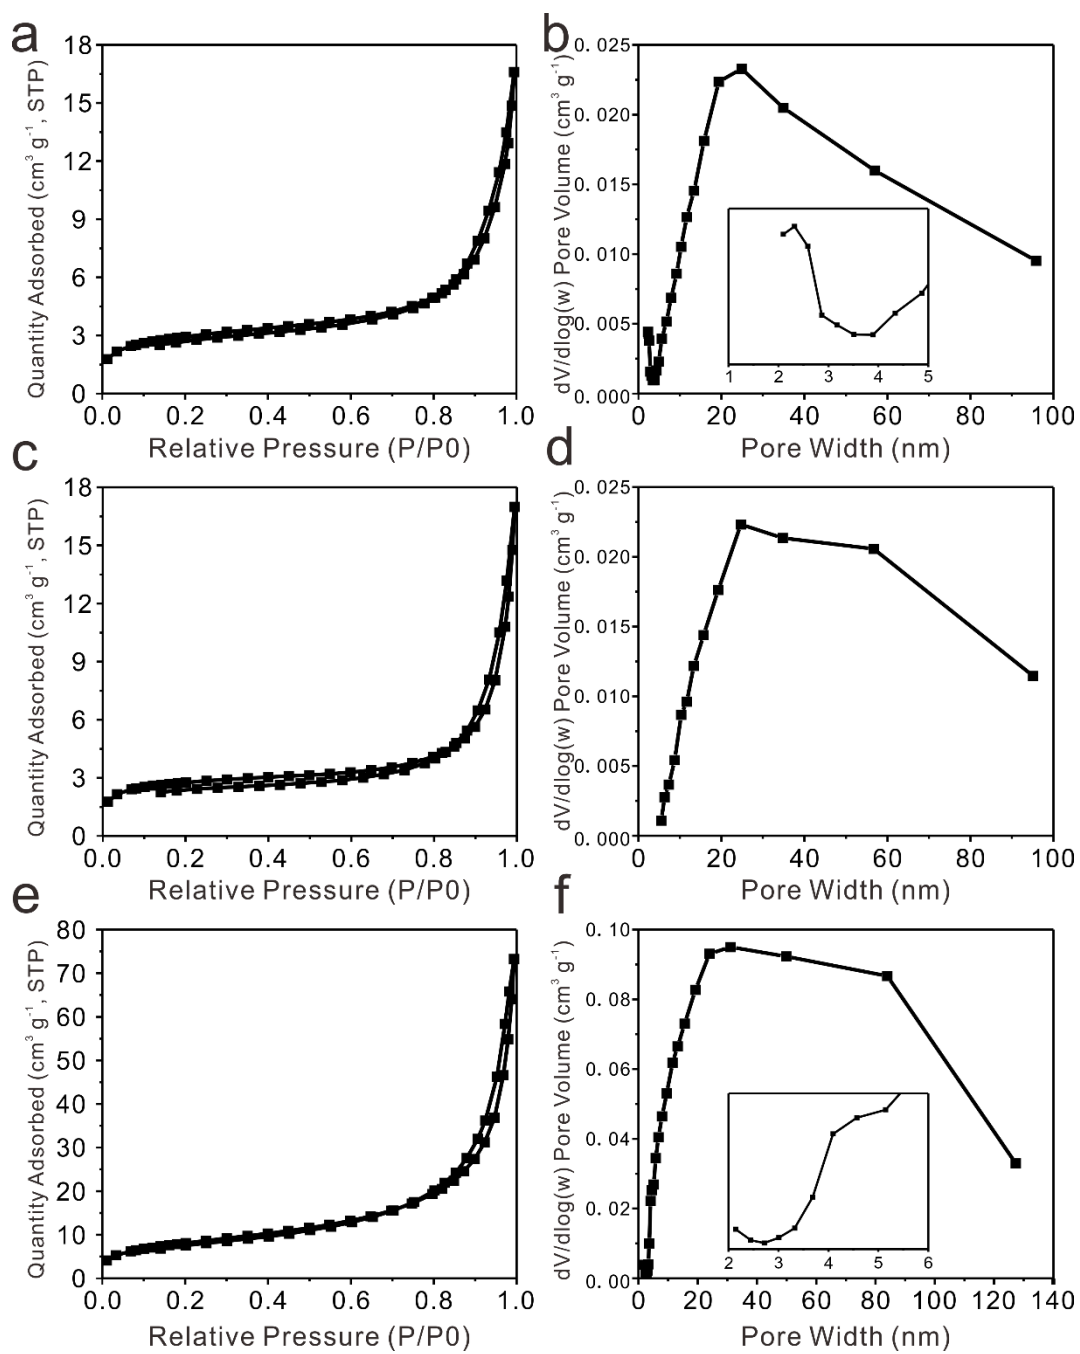

**Figure S4.** (a, c, e) Nitrogen adsorption and desorption isotherms of PBA, MPBA, and FeCoS<sub>x</sub>-PBA. (b, d, f) pore size distribution of PBA, MPBA, and FeCoS<sub>x</sub>-PBA.

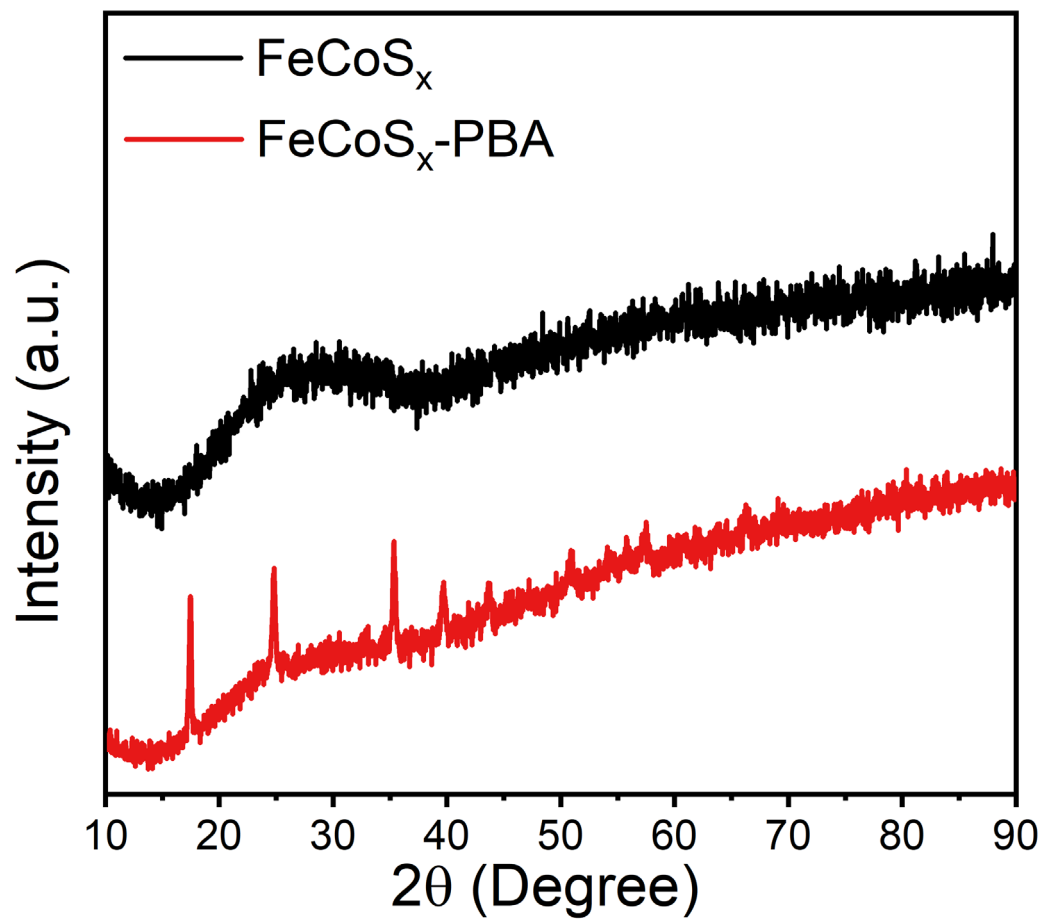

**Figure S5.** XRD spectra of  $\text{FeCoS}_x$  and  $\text{FeCoS}_x\text{-PBA}$ .

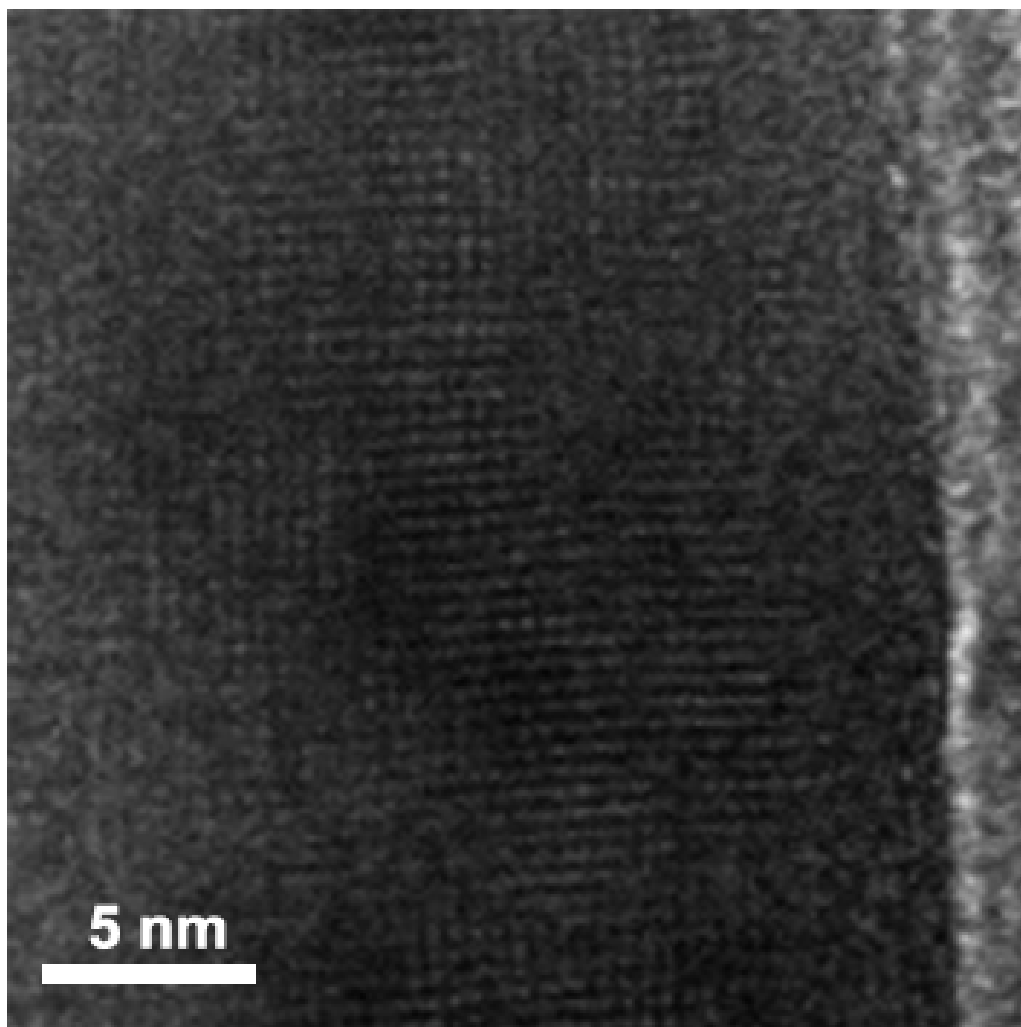

**Figure S6.** The original HRTEM image of FeCoS<sub>x</sub>-PBA.

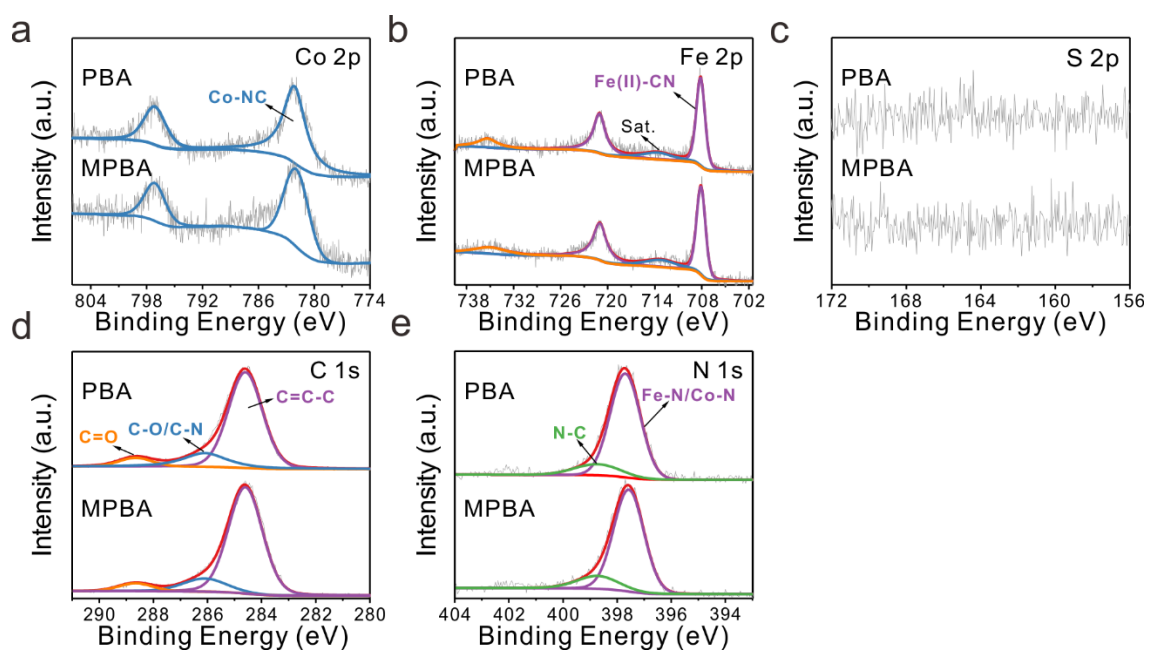

**Figure S7.** (a) Co 2p, (b) Fe 2p, (c) S 2p, (d) C 1s, (e) N 1s XPS spectra of PBA and MPBA.



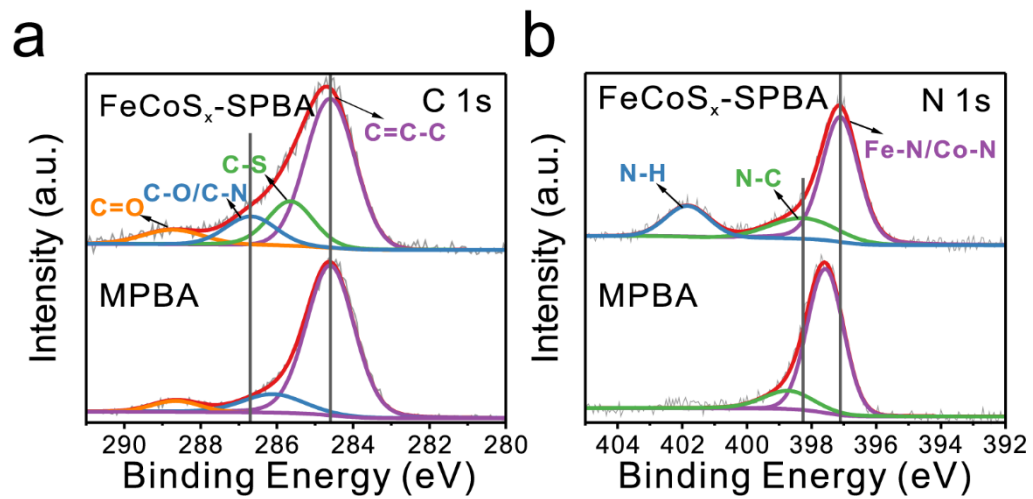

**Figure S8.** (a) C 1s, and (b) N 1s XPS spectra of FeCoS<sub>x</sub>-PBA

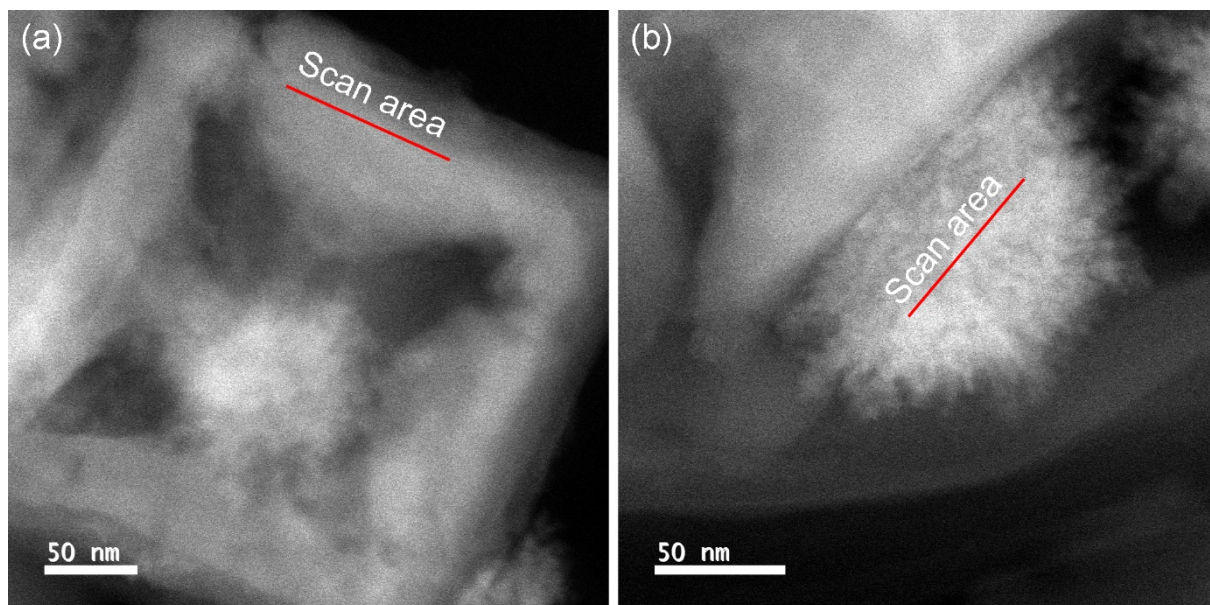

**Figure S9.** EELS scan area in FeCoS<sub>x</sub>-PBA, (a) PBA frame, (b) amorphous FeCoS<sub>x</sub>.

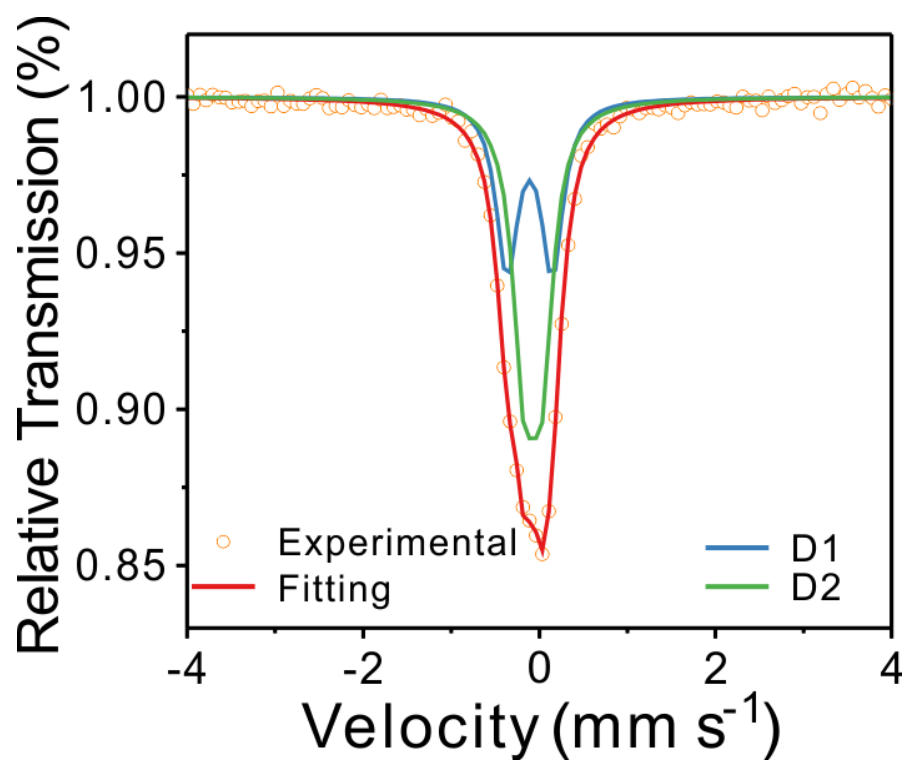

**Figure S10.** Mössbauer spectrum pattern of PBA.

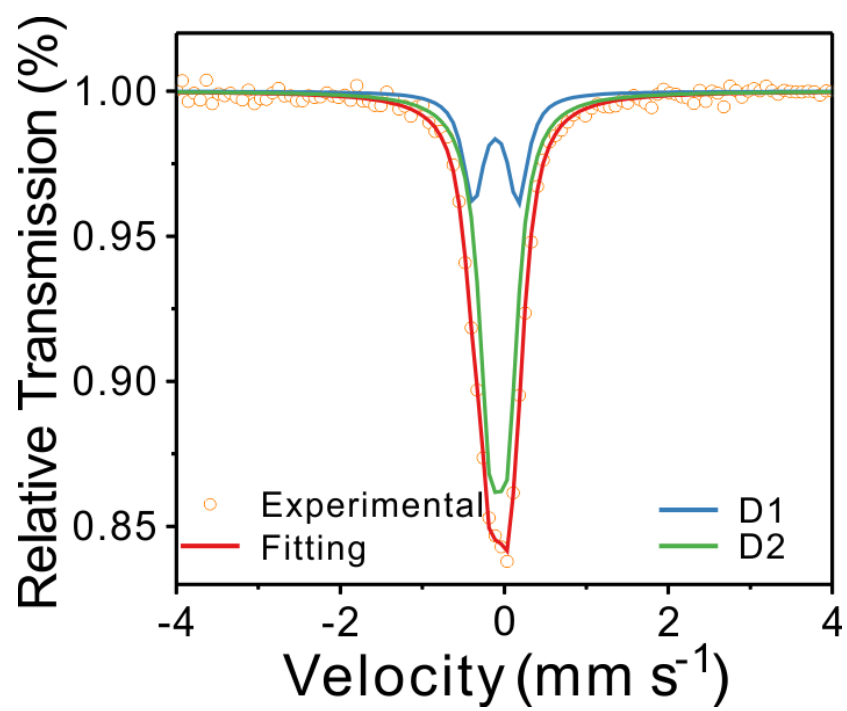

**Figure S11.** Mössbauer spectrum pattern of MPBA.

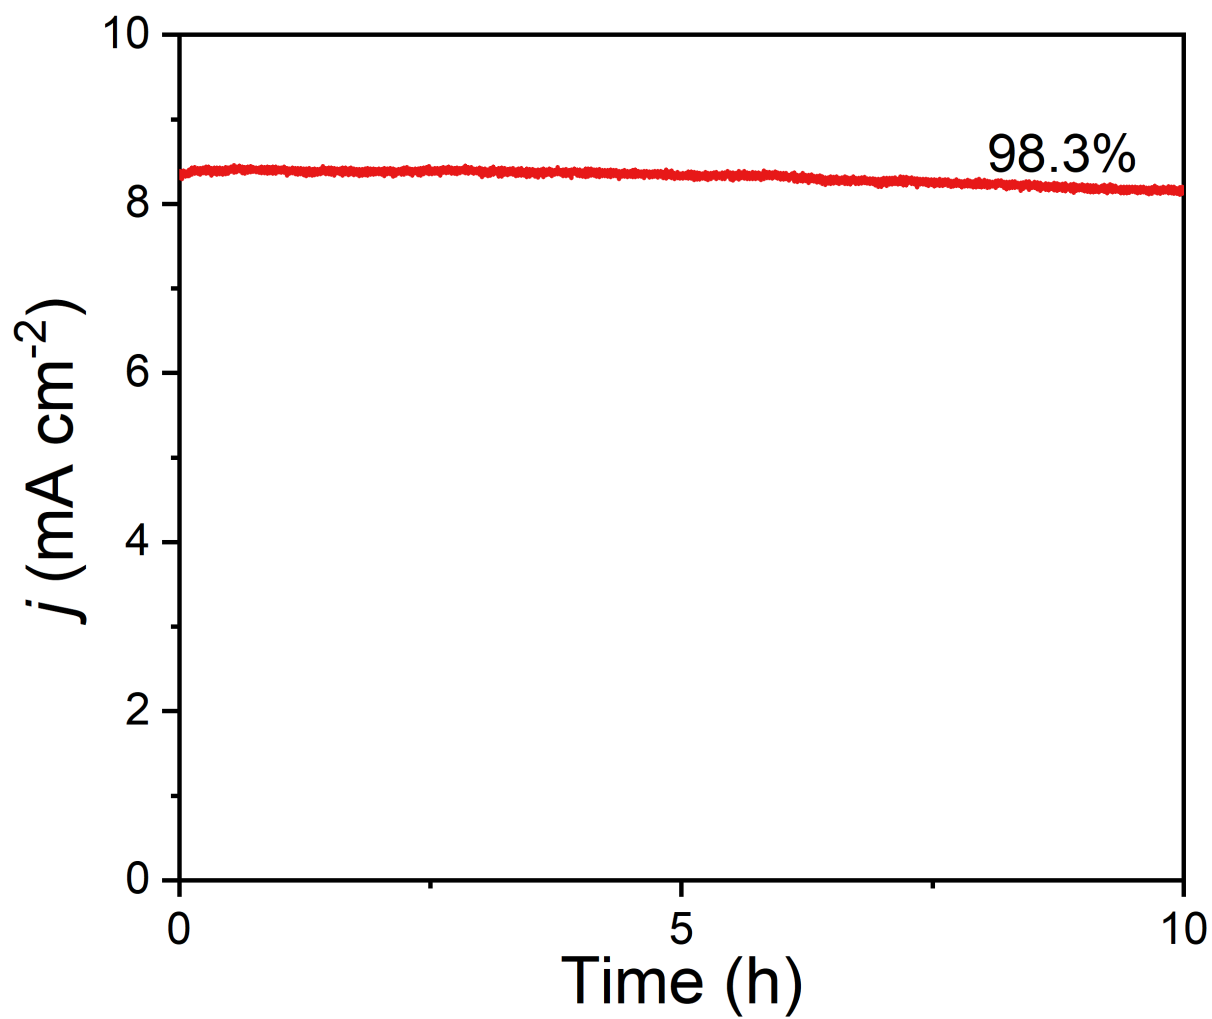

**Figure S12.** Chronoamperometric stability test of FeCoS<sub>x</sub>-PBA.

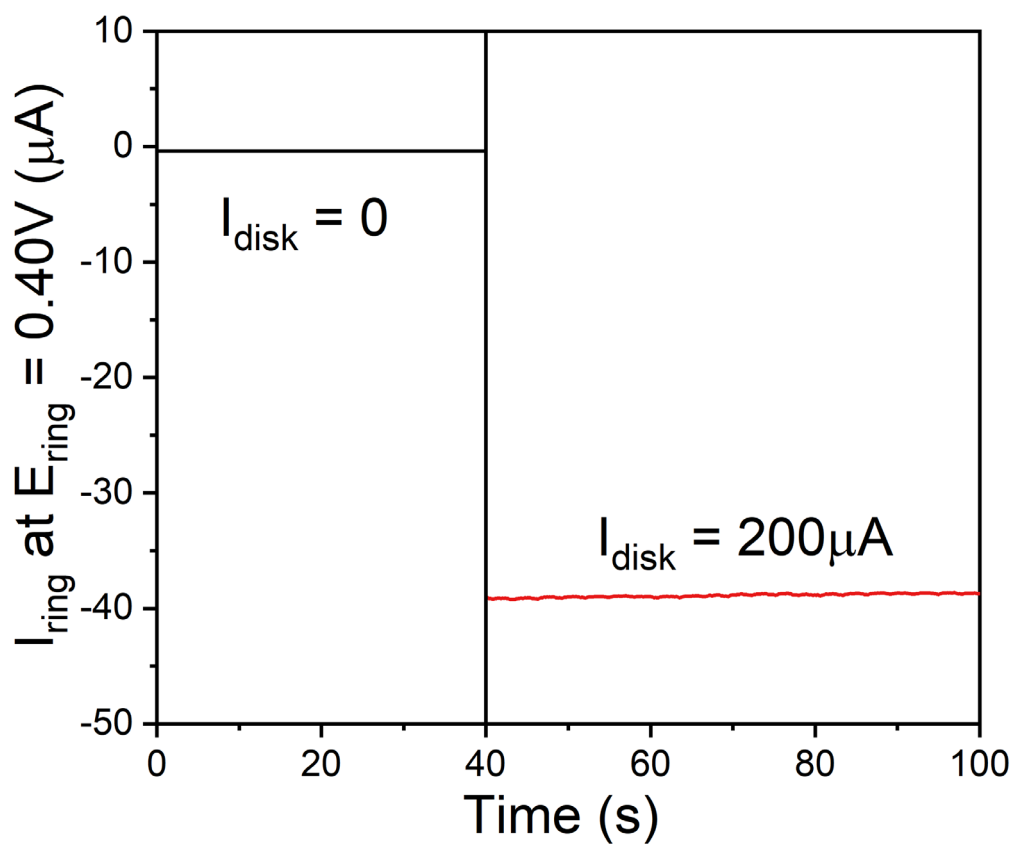

**Figure S13.** Faradic Efficiency test, ring current of FeCoS<sub>x</sub>-PBA on an RRDE (1600 rpm) in N<sub>2</sub>-saturated 1 M KOH solution (ring potential 0.40 V).

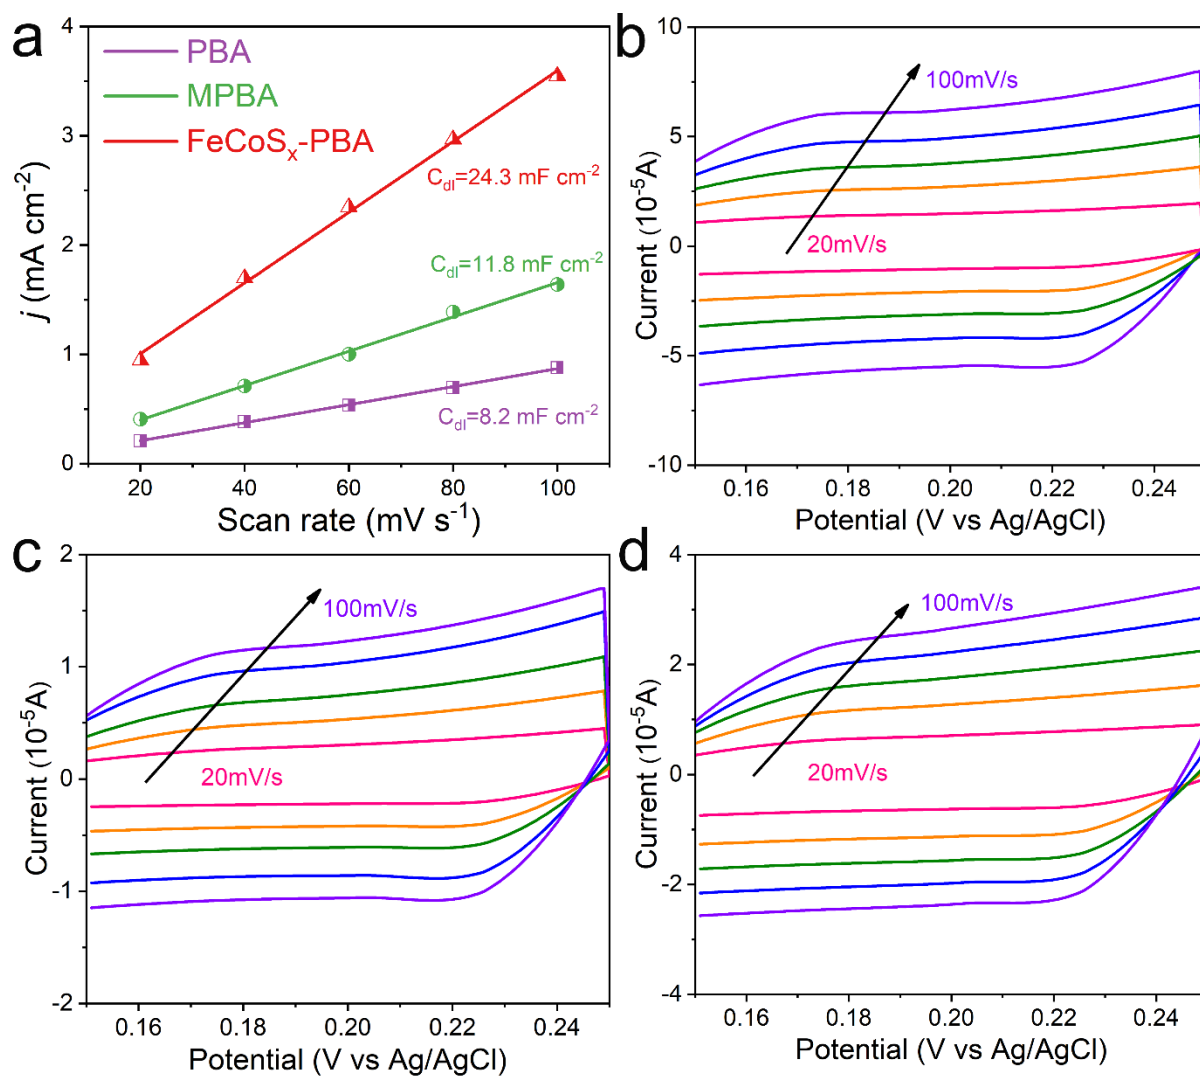

**Figure S14.** Electrochemical specific surface area test, (a) plots of the current density at 1.224 V vs the scan rate of PBA, MPBA and FeCoS<sub>x</sub>-PBA. (b) Cyclic voltammetry data of PBA. (c) Cyclic voltammetry data of MPBA. (d) Cyclic voltammetry data of FeCoS<sub>x</sub>-PBA.

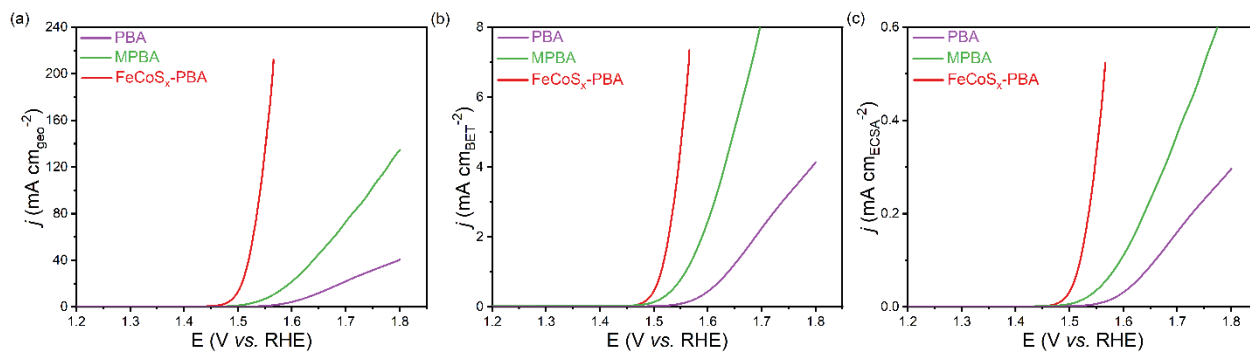

**Figure S15.** Polarization curves of PBA, MPBA, and FeCoS<sub>x</sub>-PBA in an O<sub>2</sub>-saturated 1 M KOH solution, the current is normalized by (a) electrode geometric area, (b) BET surface area, and (c) ECSA, respectively.



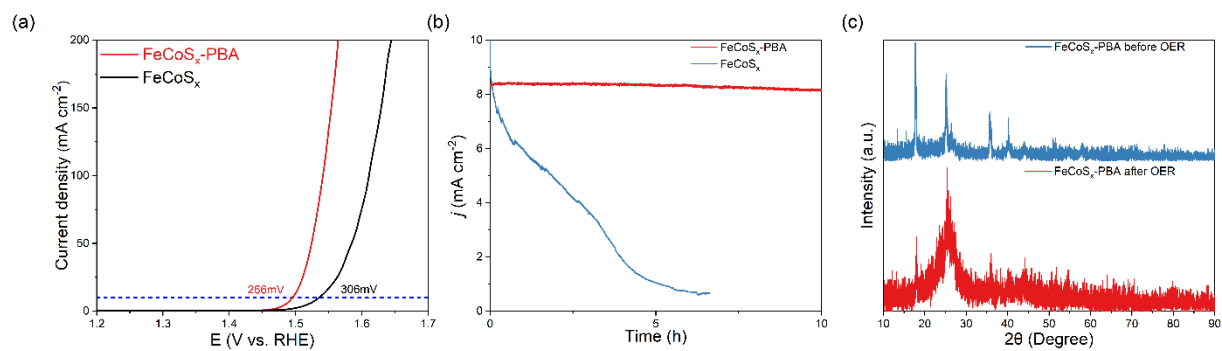

**Figure S16.** (a) Polarization curves and (b) chronoamperometric stability test of FeCoS<sub>x</sub> and FeCoS<sub>x</sub>-PBA. (c) XRD pattern of FeCoS<sub>x</sub>-PBA before and after OER test.

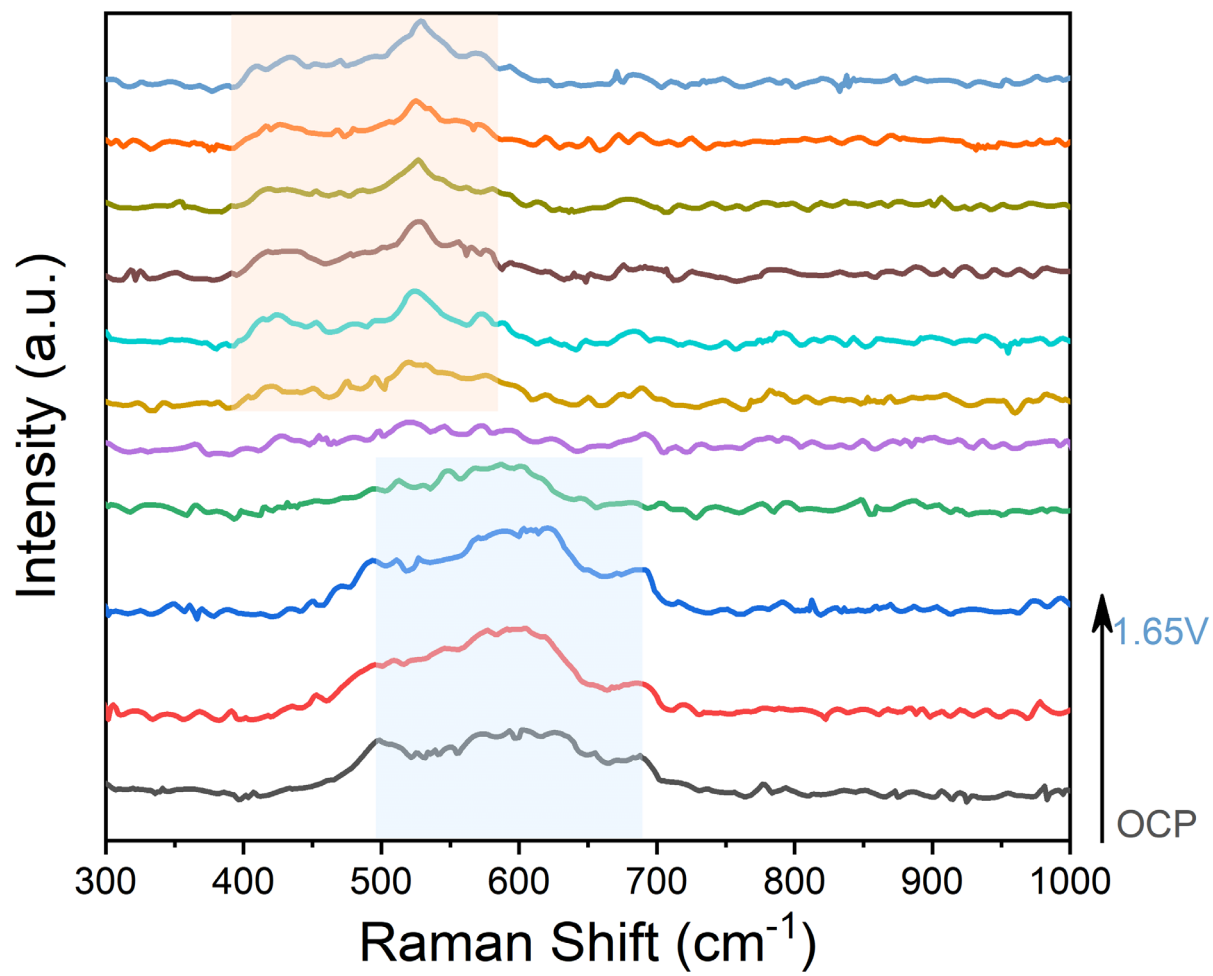

**Figure S17.** *In-situ* Raman spectrum of FeCoS<sub>x</sub>-PBA.

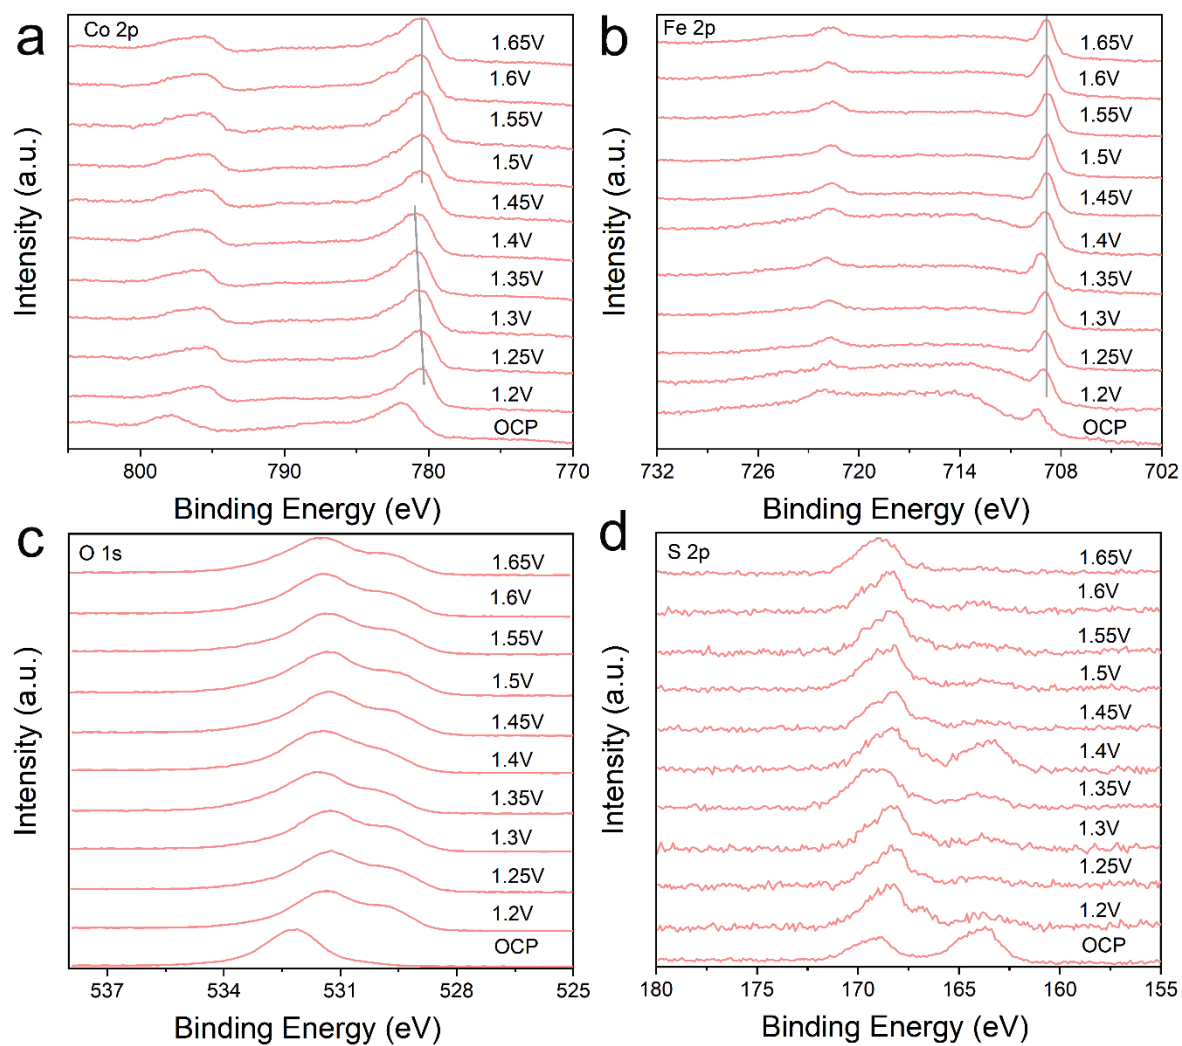

**Figure S18.** (a) Co 2p, (b) Fe 2p, (c) O 1s, (d) S 2p *quasi-in-situ* XPS spectrum of FeCoS<sub>x</sub>-PBA.

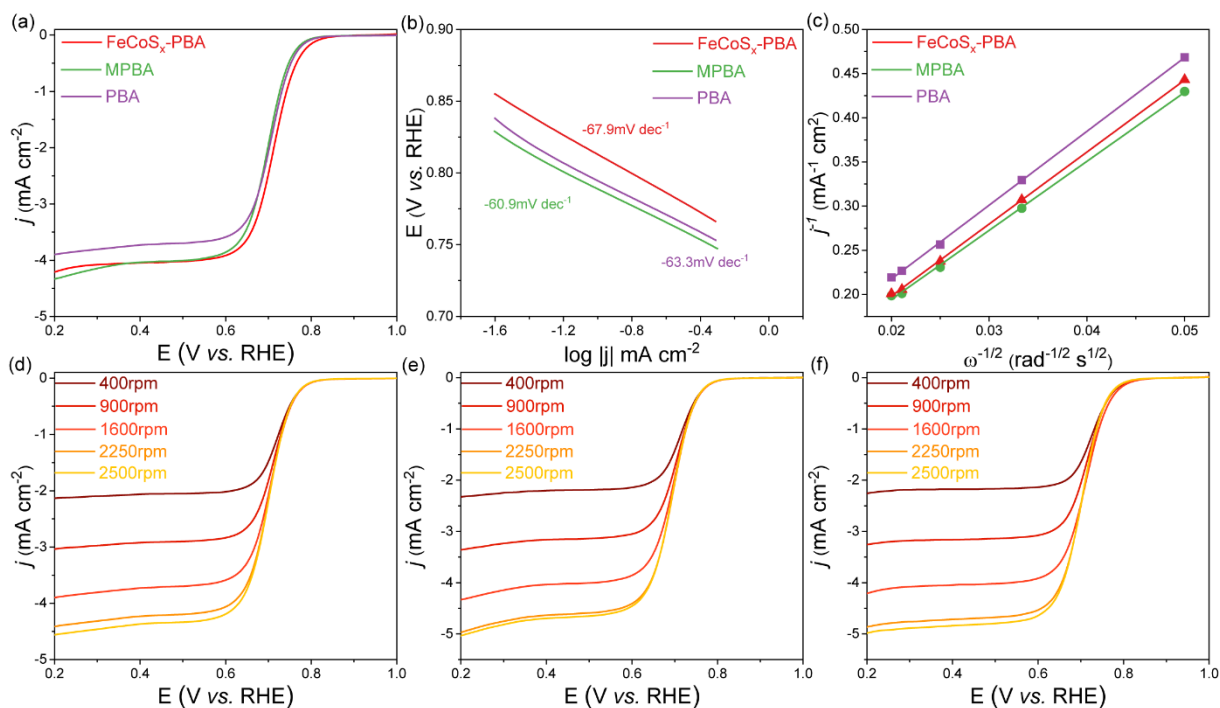

**Figure S19.** (a) ORR polarization curves of PBA, MPBA, and FeCoS<sub>x</sub>-PBA at a rotation rate of 1600 rpm in O<sub>2</sub>-saturated 1M KOH solution. (b) The Tafel plots of PBA, MPBA, and FeCoS<sub>x</sub>-PBA. (c) Koutecky-Levich plots of PBA, MPBA, and FeCoS<sub>x</sub>-PBA. The calculated electron transfer number are 3.2, 3.4, and 3.3, respectively. (d-f) Linear sweeping voltammetry curves at different rotation rate of (d) PBA, (e) MPBA, and (f) FeCoS<sub>x</sub>-PBA.

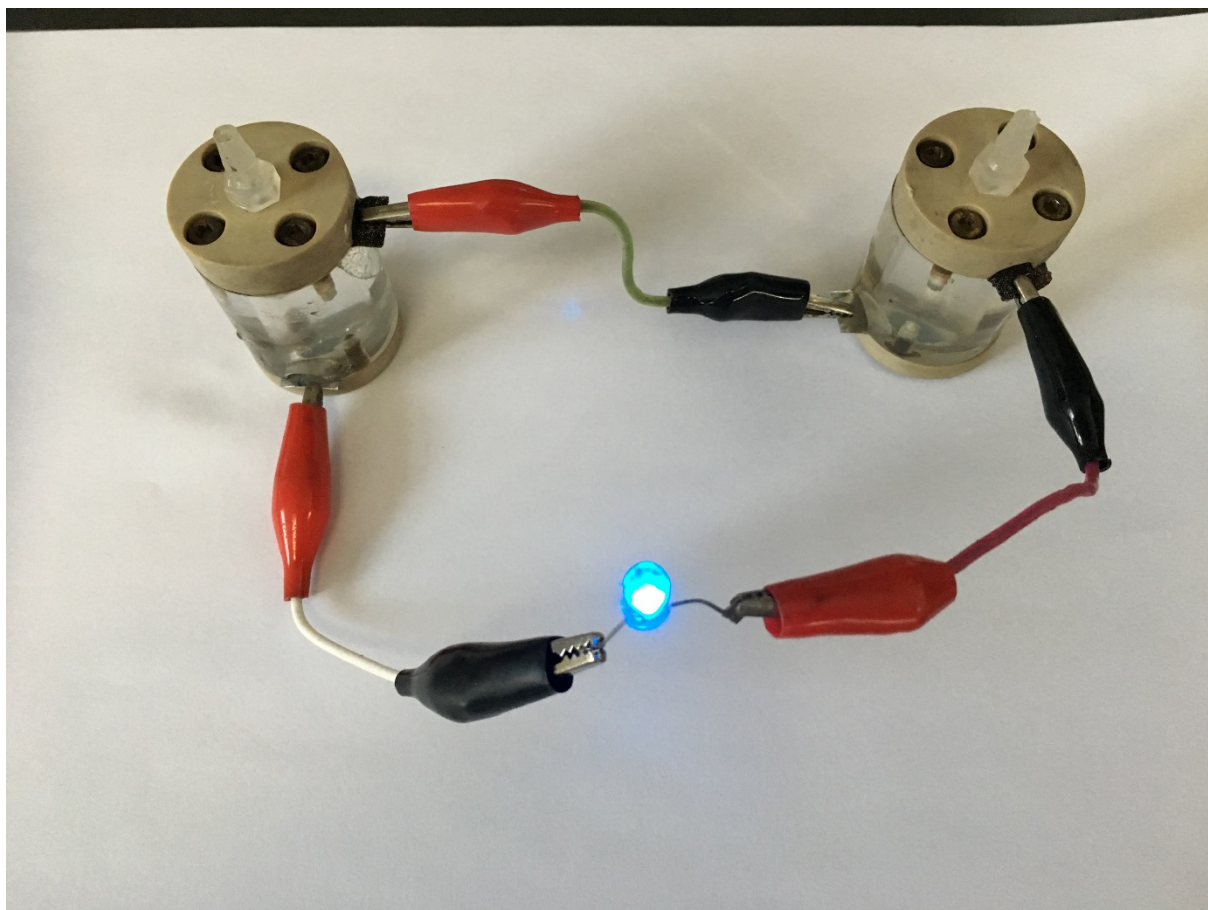

**Figure S20.** The blue light emitting diode (3.0 V) was lighted by two-series-connected Al-air batteries.

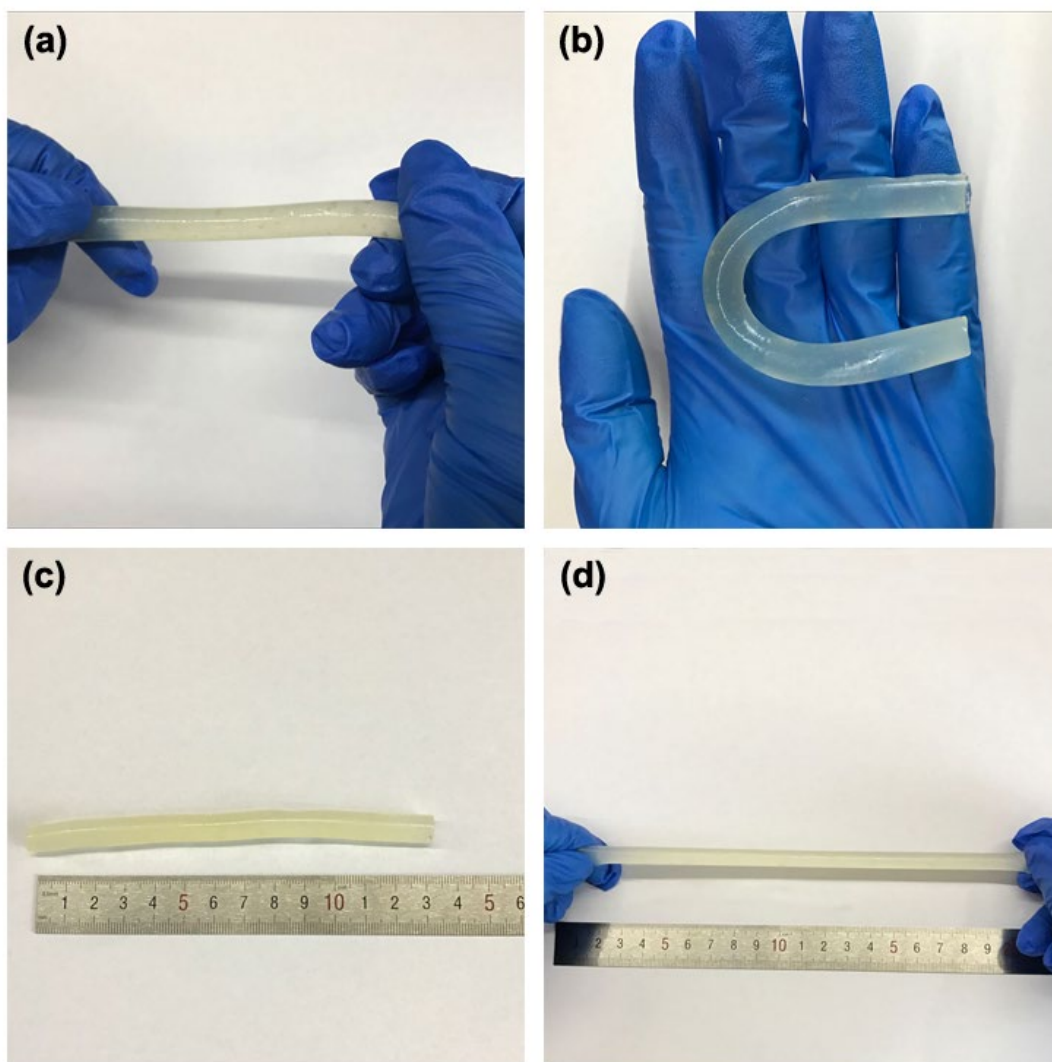

**Figure S21.** (a, b) Photographs of the fiber-like hydrogel electrolyte before and after bending, respectively. (c, d) Photographs of the fiber-like hydrogel electrolyte before and after stretching, respectively.

**Table S1.** Textural properties of as-prepared materials.

| Catalysts               | Specific surface area<br>[m <sup>2</sup> g <sup>-1</sup> ] | Pore volume<br>[cm <sup>3</sup> g <sup>-1</sup> ] | Pore diameter<br>[nm] |
|-------------------------|------------------------------------------------------------|---------------------------------------------------|-----------------------|
| PBA                     | 9.7834                                                     | 0.024556                                          | 18.1548               |
| MPBA                    | 8.8872                                                     | 0.024941                                          | 27.4943               |
| FeCoS <sub>x</sub> -PBA | 28.9122                                                    | 0.115007                                          | 18.2307               |

**Table S2.** <sup>57</sup>Fe Mössbauer parameters of PBA, MPBA, and FeCoS<sub>x</sub>-PBA derived from the fittings. Isomer shift (IS), quadrupole splitting (QS), line width (LW) and relative spectral area % of each component.

| Component                  | IS<br>[mm s <sup>-1</sup> ] | QS<br>[mm s <sup>-1</sup> ] | LW<br>[mm s <sup>-1</sup> ] | Aera<br>[%] |
|----------------------------|-----------------------------|-----------------------------|-----------------------------|-------------|
| PBA-D1                     | -0.11                       | 0.52                        | 0.29                        | 40.6        |
| PBA-D2                     | -0.07                       | 0.20                        | 0.30                        | 59.4        |
| MPBA-D1                    | -0.11                       | 0.55                        | 0.29                        | 25.6        |
| MPBA-D2                    | -0.07                       | 0.21                        | 0.32                        | 74.4        |
| FeCoS <sub>x</sub> -PBA-D1 | 0.01                        | 0.15                        | 0.30                        | 55.9        |
| FeCoS <sub>x</sub> -PBA-D2 | 0.23                        | 0.78                        | 0.33                        | 44.1        |

**Table S3.** Comparison of OER electrocatalytic activities for FeCoS<sub>x</sub>-PBA with other catalysts.

| Catalysts                                          | Overpotential at<br><i>j</i> = 10 mA cm <sup>-2</sup> [mV] | Tafel slope<br>[mV dec <sup>-1</sup> ] | <i>Ref.</i>      |
|----------------------------------------------------|------------------------------------------------------------|----------------------------------------|------------------|
| <b>FeCoS<sub>x</sub>-PBA</b>                       | <b>266</b>                                                 | <b>33</b>                              | <b>This work</b> |
| Co <sub>9</sub> S <sub>8</sub>                     | 265                                                        | 56                                     | 1                |
| Co <sub>8</sub> FeS <sub>8</sub> /CoS              | 292                                                        | 83                                     | 2                |
| Co <sub>3</sub> O <sub>4</sub>                     | 253                                                        | 74.6                                   | 3                |
| Ni <sub>0.85</sub> Fe <sub>0.15</sub> PS           | 251                                                        | 34                                     | 4                |
| Co <sub>9</sub> S <sub>8</sub> /CoS <sub>2</sub>   | 396                                                        | 182                                    | 5                |
| Fe <sub>0.1</sub> Ni <sub>0.9</sub> S <sub>2</sub> | 260                                                        | 46                                     | 6                |
| CoSe <sub>2</sub>                                  | 320                                                        | 44                                     | 7                |
| NiCoP-C                                            | 320                                                        | 96                                     | 8                |

**Table S4.** The performance of Al-air batteries with various electrocatalysts.

| Catalysts                                            | Loading<br>[mg cm <sup>-2</sup> ] | Peak power<br>density<br>[mW cm <sup>-2</sup> ] | Specific<br>capacity<br>[mAh g <sup>-1</sup> ] | Energy<br>density<br>[Wh Kg <sup>-1</sup> ] | Ref.                 |
|------------------------------------------------------|-----------------------------------|-------------------------------------------------|------------------------------------------------|---------------------------------------------|----------------------|
| <b>FeCoS<sub>x</sub>-PBA</b>                         | <b>2</b>                          | <b>58.3</b>                                     | <b>1259</b>                                    | <b>1483</b>                                 | <b>This<br/>work</b> |
| Ag-coated CNT                                        | 0.0669                            | 1.33                                            | 935                                            | 1168                                        | 9                    |
| La <sub>0.6</sub> Ca <sub>0.4</sub> CoO <sub>3</sub> | -                                 | 16                                              | 458                                            | 641                                         | 10                   |
| MnO <sub>x</sub> /carbon<br>fiber                    | -                                 | 5.5                                             | 105                                            | 176.4                                       | 11                   |
| LiMn <sub>2</sub> O <sub>4</sub> /N-rGO              | 1.5                               | 6.6                                             | 585                                            | 673                                         | 12                   |
| Carbon black                                         | 0.43                              | 3                                               | 496                                            | 267.8                                       | 13                   |
| CoO                                                  | -                                 | 48                                              | 523.6                                          | 451.1                                       | 14                   |
| N-rGO                                                | 1.5                               | 7                                               | 254.6                                          | 130                                         | 15                   |
| 60% Pt/C                                             | 2                                 | 83                                              | 74                                             | 92                                          | 16                   |
| N,S-porous<br>carbon                                 | 0.5                               | 46                                              | 288                                            | 273                                         | 17                   |
| CoP@N,P-<br>CNFs                                     | -                                 | 72.8                                            | 2824.3                                         | -                                           | 18                   |
| 3D nanoporous<br>N-doped carbon                      | 0.5                               | 130.5                                           | -                                              | -                                           | 19                   |

## References

- [1] H. Zhang, J. Wang, Q. Cheng, P. Saha, H. Jiang, *Green Energy & Environ.* 2020, **5**, 492.
- [2] B. Wang, Y. Chen, X. Wang, X. Zhang, Y. Hu, B. Yu, D. Yang, W. Zhang, *J. Power Sources.* 2020, **449**, 227561.
- [3] B. Jin, Y. Li, J. Wang, F. Meng, S. Cao, B. He, S. Jia, Y. Wang, Z. Li, X. Liu, *Small.* 2019, **15**, 1903847.
- [4] W. Peng, J. Li, K. Shen, L. Zheng, H. Tang, Y. Gong, J. Zhou, N. Chen, S. Zhao, M. Chen, F. Gao, H. Gou, *J. Mater. Chem. A.* 2020, **8**, 23580.
- [5] Y. Dong, J. Ran, Q. Liu, G. Zhang, X. Jiang, D. Gao, *RSC Adv.* 2021, **11**, 30448.
- [6] X. Ding, W. Li, H. Kuang, M. Qu, M. Cui, C. Zhao, D.-C. Qi, F. E. Oropeza, K. H. L. Zhang, *Nanoscale.* 2019, **11**, 23217.



- [7] Y. Liu, H. Cheng, M. Lyu, S. Fan, Q. Liu, W. Zhang, Y. Zhi, C. Wang, C. Xiao, S. Wei, B. Ye, Y. Xie, *J. Am. Chem. Soc.* 2014, **136**, 15670.
- [8] P. He, X. Y. Yu, X. W. Lou, *Angew. Chem. Int. Ed.* 2017, **129**, 3955.
- [9] Y. Xu, Y. Zhao, J. Ren, Y. Zhang, H. Peng, *Angew. Chem. Int. Ed.* 2016, **128**, 8111.
- [10] C. Li, W. Ji, J. Chen, Z. Tao, *Chem. Mater.* 2007, **19**, 5812.
- [11] A. A. Mohamad, *Corros. Sci.* 2008, **50**, 3475.
- [12] Y. Liu, J. Li, W. Li, Y. Li, Q. Chen, Y. Liu, *Int. J. Hydrogen. Energ.* 2015, **40**, 9225.
- [13] S. Choi, D. Lee, G. Kim, Y. Y. Lee, B. Kim, J. Moon, W. Shim, *Adv. Funct. Mater.* 2017, **27**, 1702244.
- [14] I. J. Park, S. R. Choi, J. G. Kim, *J. Power. Sources.* 2017, **357**, 47.
- [15] Y. Liu, J. Li, W. Li, Y. Li, F. Zhan, H. Tang, Q. Chen, *Int. J. Hydrogen. Energ.* 2016, **41**, 10354.
- [16] L. Wang, F. Liu, W. Wang, G. Yang, D. Zheng, Z. Wub, M. K. H. Leungc, *RSC Adv.* 2014, **4**, 30857.
- [17] L. Xu, H. Fan, L. Huang, J. Xia, S. Li, M. Li, H. Ding, K. Huang, *Electrochim. Acta.* 2017, **239**, 1.
- [18] J. Liu, C. Zhang, S. Yuan, W. Yang, Y. Cao, J. Deng, B. Xu, H. Lu, *Chem. Eng. J.* 2022, **428**, 131326.
- [19] K. Hu, T. Yu, Y. Zhang, X. Lin, Y. Zhao, G. Xie, X. Liu, X. Lin, J. Fujita, H.-J. Qiu, Y. Ito, *Adv. Funct. Mater.* 2021, **31**, 2103632.
